# Supplementary material for: The mobility and solvation structure of a hydroxyl radical in a water nanodroplet: a Born–Oppenheimer molecular dynamics study
Source: Royal Society of Chemistry journal article supplement (doi:10.1039/d1cp01830b), 2021-01-01
Supplement: d1cp01830b1.pdf [file d1cp01830b1.pdf]

## Supplementary Information

# **Mobility and Solvation Structure of Hydroxyl Radical in a Water Nanodroplet: A Born-Oppenheimer Molecular Dynamics Study**

Mohammad Hassan Hadizadeh,<sup>‡</sup> Lewen Yang,<sup>‡</sup> Guoyong Fang, Zongyang Qiu, Zhenyu Li\*

Hefei National Laboratory of Physical Sciences at the Microscale, University of Science and Technology of China, Hefei, Anhui, 230026, China

*Email: zyli@ustc.edu.cn*

## 1. Definition of the air-water interface

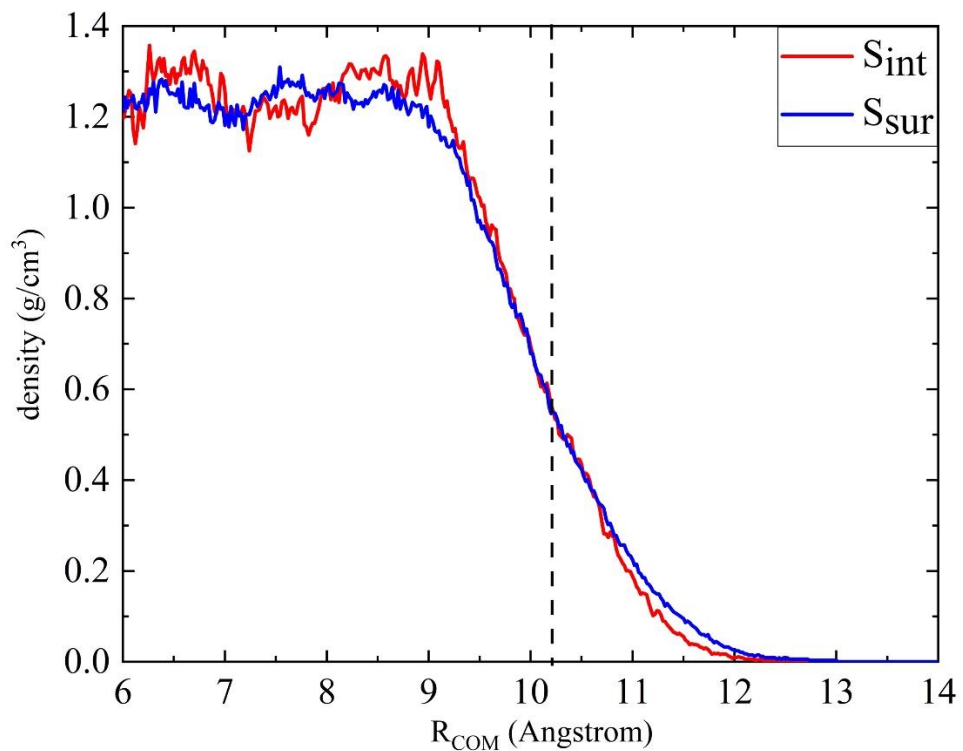

**Fig. S1.** Density profile of water molecules in the 191 H<sub>2</sub>O nanodroplet with OH\* being initially placed in the interior region (red) and in the surface region (blue). The vertical dashed line located at 10.2 Å which corresponds to half of the bulk water density is defined as the air-water interface.

## 2. The deformation of water nanodroplet

Deformation (D) is defined as:

$$D = \frac{R_{max} - R_{min}}{R_{ave}}$$

where  $R_{max}$ ,  $R_{min}$ , and  $R_{ave}$  are the maximum, minimum, and average distances between the droplet center and surface water molecules. As shown in **Figure S2**, trajectory  $S_{sur}$  undergoes a larger deformation compared to trajectory  $S_{int}$ .

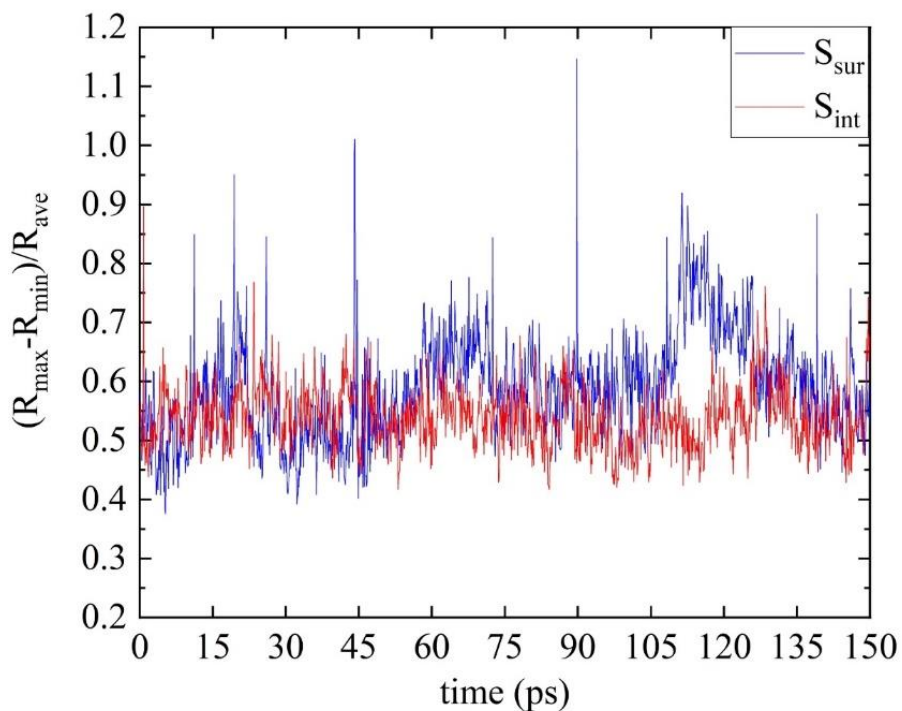

**Fig. S2.** The deformation of the water droplet *versus* simulation time for trajectory  $S_{sur}$  and  $S_{int}$ .

### 3. Atomic charges on the hydroxyl radical

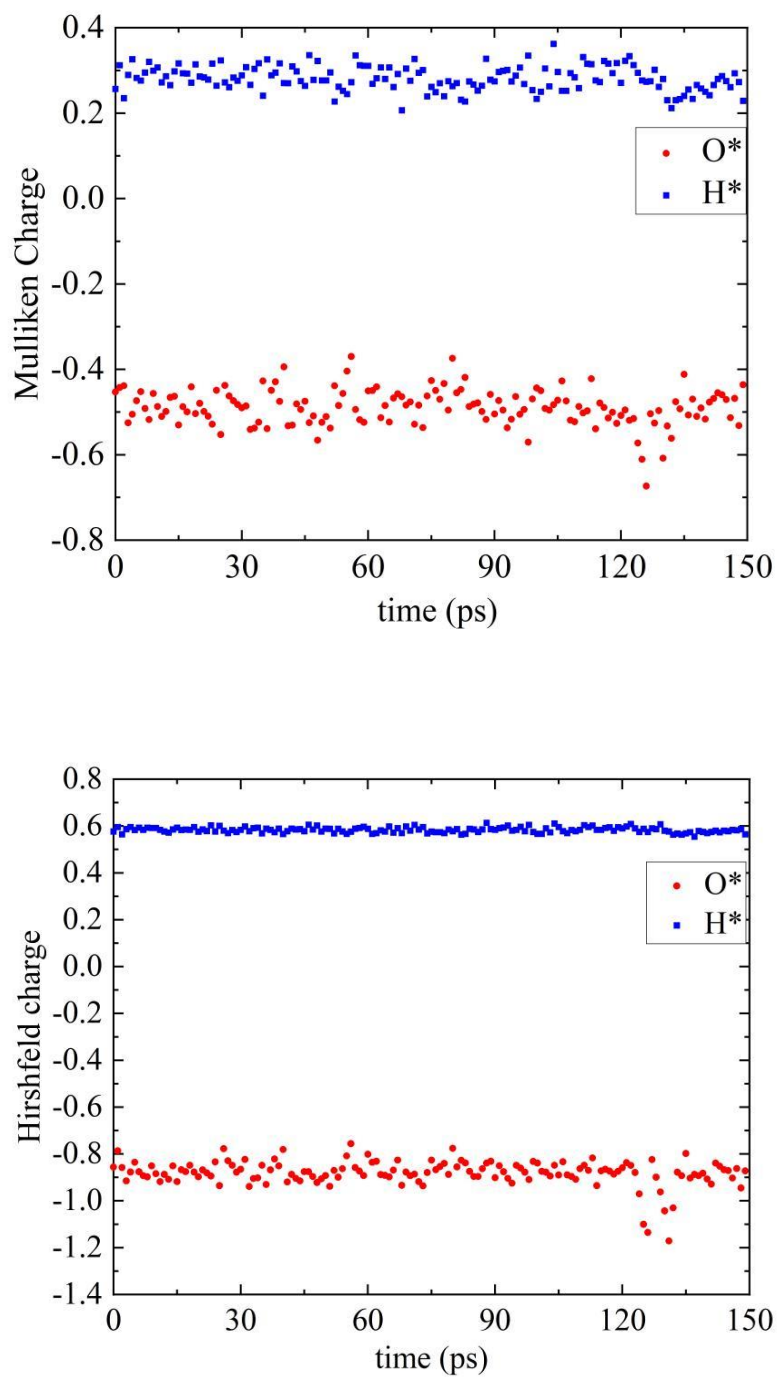

**Fig. S3.** The Mulliken and Hirshfeld charges of O\* and H\* in the hydroxyl radical.

#### 4. Geometric criteria in defining hemibond

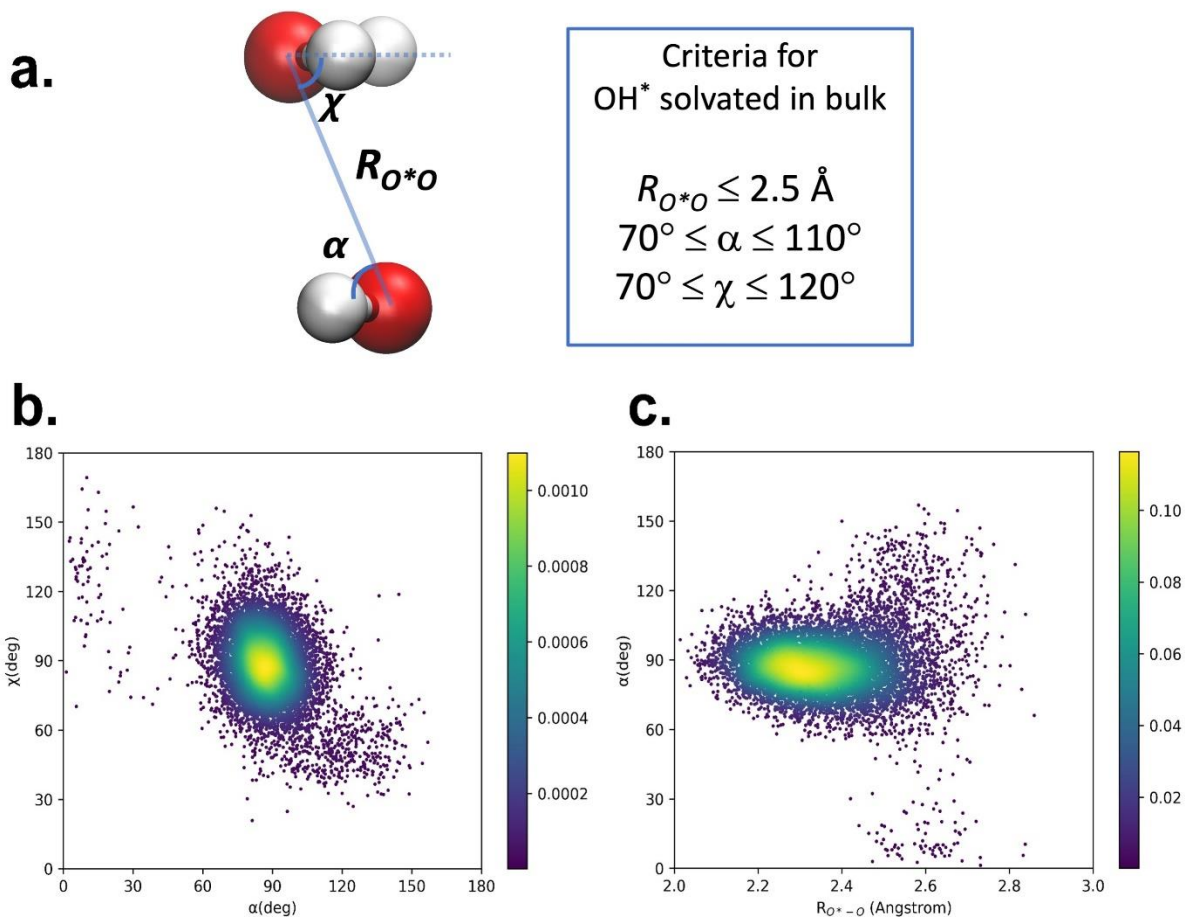

**Fig. S4.** (a) Schematic view of using the  $\text{O}^*$ -O distance  $R_{\text{O}^*\text{O}}$ , the  $\text{OH}^*$  tilt angle  $\alpha$ , and the  $\text{O}^*$ -O azimuthal angle  $\chi$  to define hemibonded structures. Geometric criteria for  $\text{OH}^*$  in the bulk are taken from ref. 21 (see main text). (b) Joint probability distribution  $P(\alpha, \chi)$  and (c) Joint probability distribution  $P(R_{\text{O}^*\text{O}}, \alpha)$  computed for trajectory  $S_{\text{int}}$  from 30 ps to 125 ps. (Distribution plots for  $S_{\text{sur}}$  are very similar, which are not shown in here.)

## 5. $d_{O^*-O}$ versus time when simulated at the B3LYP-D3 level

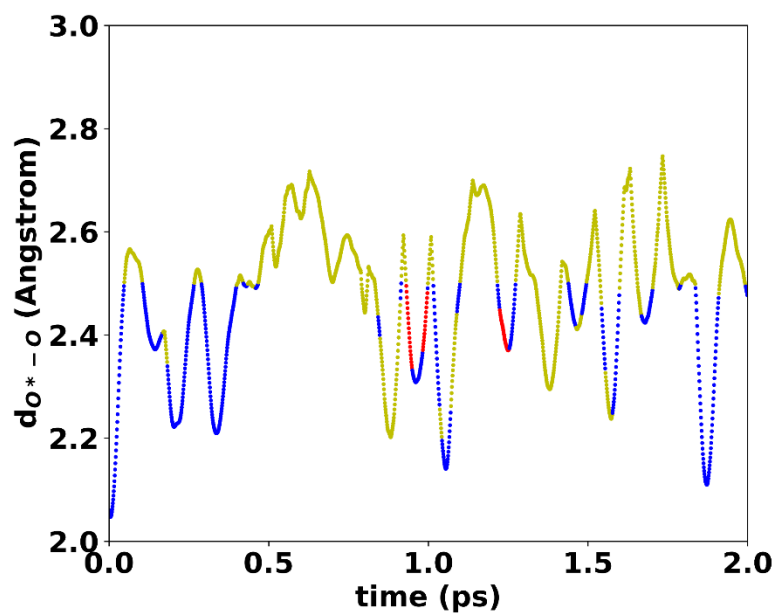

**Fig. S5.** The distance between  $O^*$  and its closest oxygen atom. Distances corresponding to hemibonded-configurations with one, two, and three H-atom donors to  $O^*$  are colored in green, blue, and red respectively. Distances corresponding to those without hemibond are colored in Kelly green.

## 6. Hydrogen bond statistics for OH\* complex at the surface

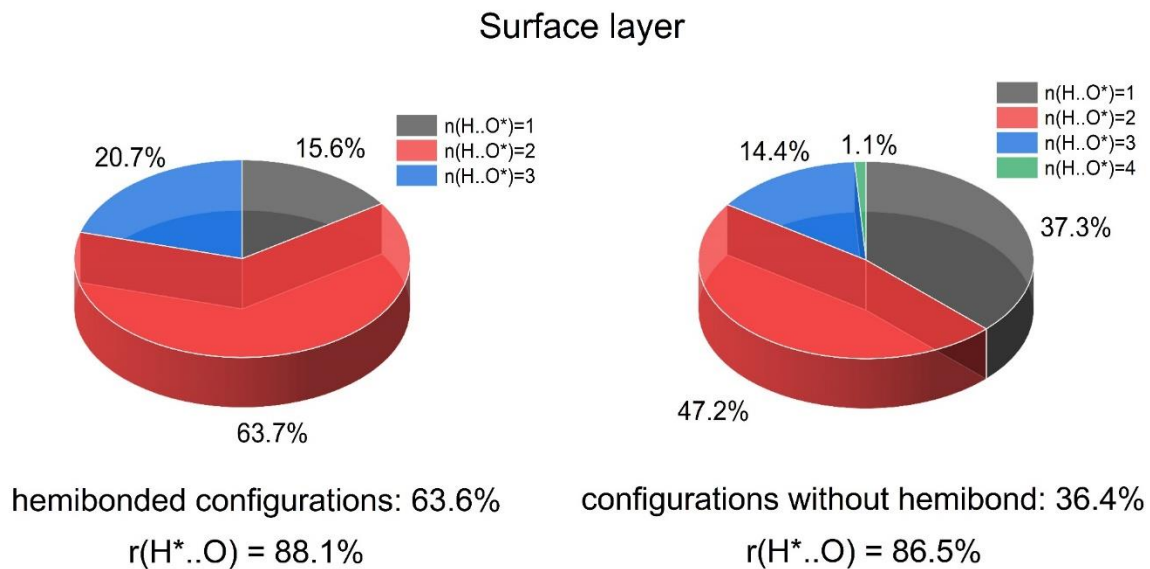

**Fig. S6.** The percentage of different numbers of hydrogen bonds connecting to O\* with (left) or without (right) a hemibond for trajectory  $S_{\text{sur}}$  from 0 to 30 ps.  $r(\text{H}^*..O)$  denotes the ratio of configurations where H\* forms a hydrogen bond with water oxygen.

## 7. $d_{O^*-O}$ versus time when simulated using TZVP basis

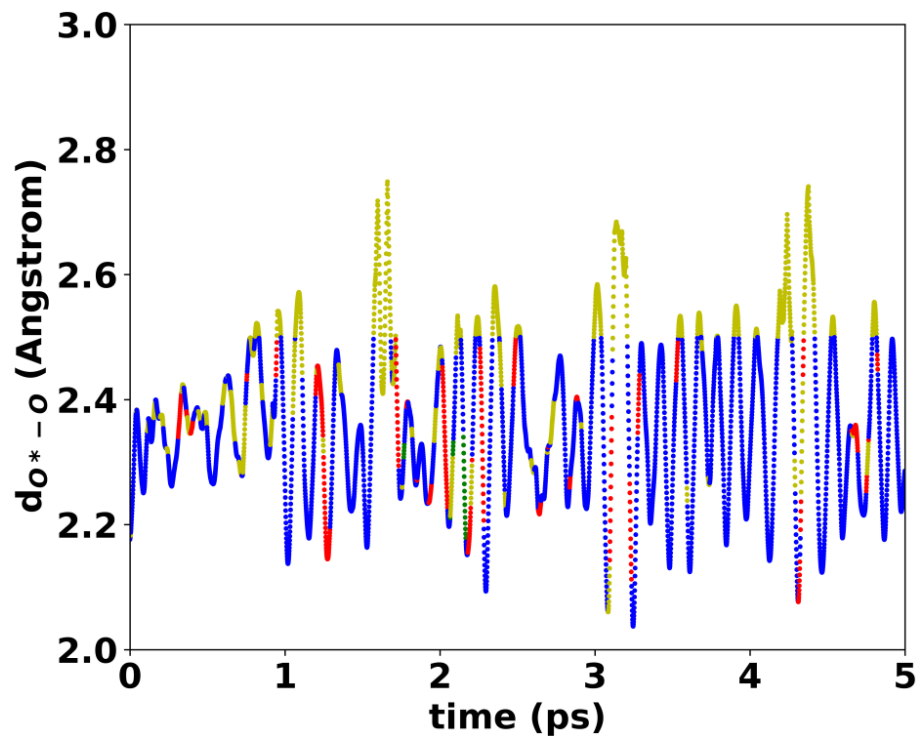

**Fig. S7.** The distance between  $O^*$  and its closest oxygen atom. Distances corresponding to hemibonded-configurations with one, two, and three H-atom donors to  $O^*$  are colored in green, blue, and red respectively. Distances corresponding to those without hemibond are colored in Kelly green.



## 8. $P(\theta, \phi)$ for water oxygen atoms and water hydrogen atoms among hemibonded structures

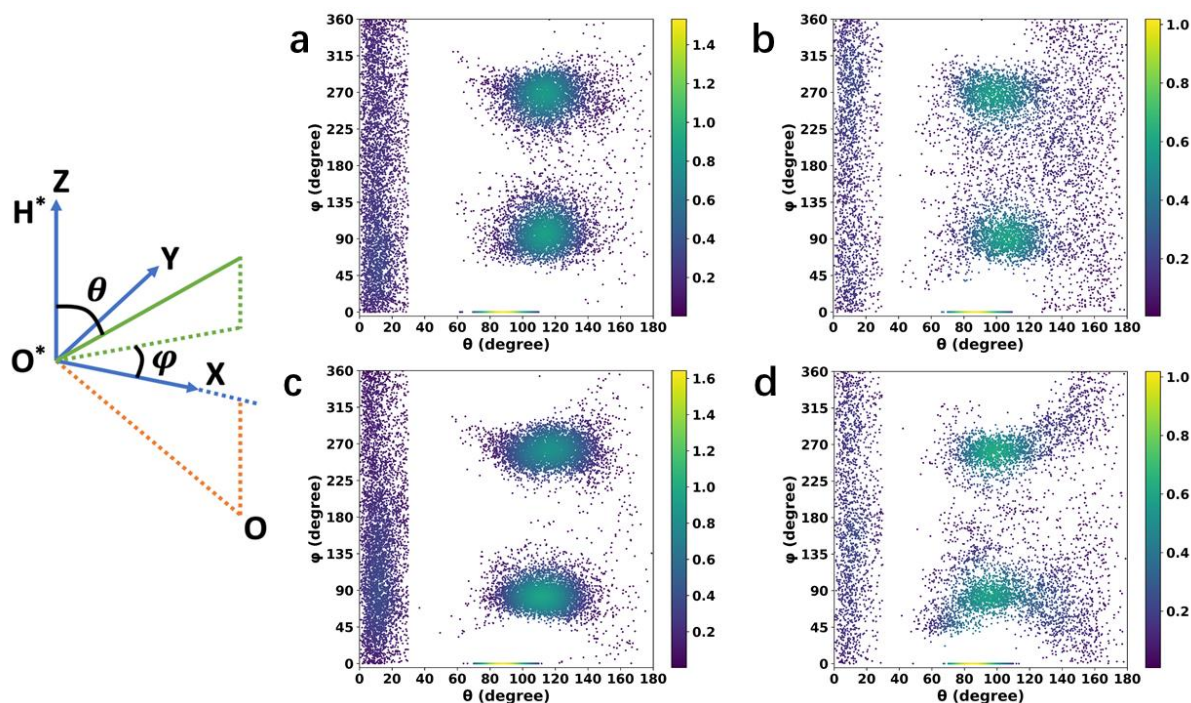

**Fig. S8.** Joint probability distributions  $P(\theta, \phi)$  computed for water oxygen atoms and water hydrogen atoms that are hydrogen-bonded or hemibonded to  $\text{OH}^*$  are depicted in (a) and (b) for  $\text{OH}^*$  in the subsurface layer with 2 and 3 hydrogen bond donors to the hemibonded  $\text{O}^*$  atom, (c) and (d) for  $\text{OH}^*$  in the interior region with 2 and 3 hydrogen bond donors to the hemibonded  $\text{O}^*$  atom, respectively. The plot is based on a Cartesian coordinate with Z axis being the vector  $\vec{r}_{\text{O}^*\text{H}^*}$ , and X axis being the vector on the  $\text{H}^*-\text{O}^*-\text{O}$  plane and is simultaneously perpendicular to Z axis.  $\theta$  is the angle from Z axis to vector  $\vec{r}_{\text{O}^*\text{O}}$  or  $\vec{r}_{\text{O}^*\text{H}^*}$ , and  $\phi$  is the angle from X axis to the projection of vector  $\vec{r}_{\text{O}^*\text{O}}$  or  $\vec{r}_{\text{O}^*\text{H}^*}$  onto the X-Y plane.

## 9. The fitting of $C(t)$

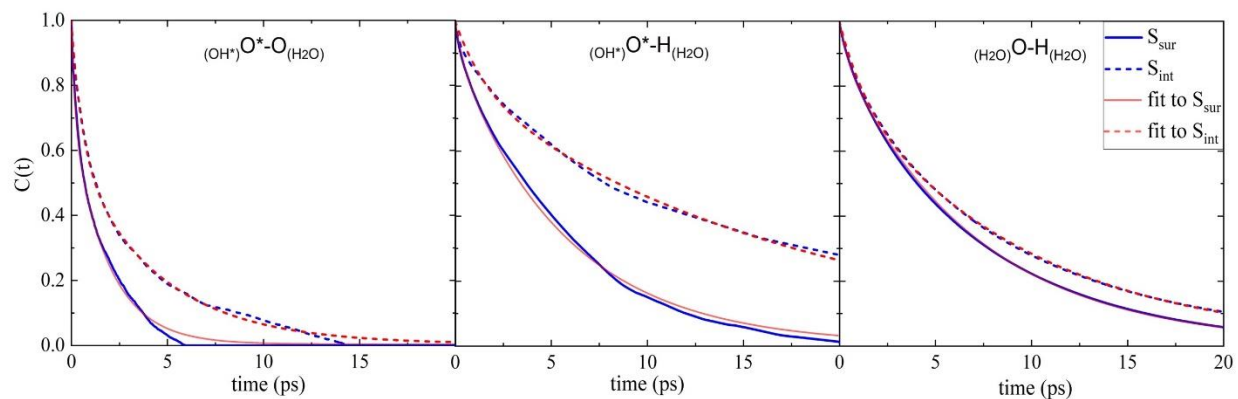

**Fig. S9.** The correlation function  $C(t)$  and its corresponding biexponential fit of  $(\text{OH}^*)\text{O}^*-\text{O}_{(\text{H}_2\text{O})}$  (hemibond),  $(\text{OH}^*)\text{O}^*-\text{H}_{(\text{H}_2\text{O})}$  ( $\text{OH}^*$ -involved hydrogen bonds) and  $(\text{H}_2\text{O})\text{O}-\text{H}_{(\text{H}_2\text{O})}$  (hydrogen bonds among water molecules only) for trajectory  $S_{\text{sur}}$  (solid curve) and  $S_{\text{int}}$  (dashed curve), respectively. For the  $C(t)$  of  $(\text{OH}^*)\text{O}^*-\text{O}_{(\text{H}_2\text{O})}$ , the biexponential fit gives  $\tau_1 = 0.2$  ps,  $\tau_2 = 1.9$  ps for  $S_{\text{sur}}$ , and  $\tau_1 = 0.6$  ps,  $\tau_2 = 4.4$  ps for  $S_{\text{int}}$ . For the  $C(t)$  of  $(\text{OH}^*)\text{O}^*-\text{H}_{(\text{H}_2\text{O})}$ , the biexponential fit gives  $\tau_1 = 0.5$  ps,  $\tau_2 = 5.8$  ps for  $S_{\text{sur}}$ , and  $\tau_1 = 1.6$  ps,  $\tau_2 = 17.9$  ps for  $S_{\text{int}}$ . For the  $C(t)$  of  $(\text{H}_2\text{O})\text{O}-\text{H}_{(\text{H}_2\text{O})}$ , the biexponential fit gives  $\tau_1 = 0.5$  ps,  $\tau_2 = 7.1$  ps for  $S_{\text{sur}}$ , and  $\tau_1 = 1.3$  ps,  $\tau_2 = 9.6$  ps for  $S_{\text{int}}$ .

## 10. Snapshots for HT3 and HT4

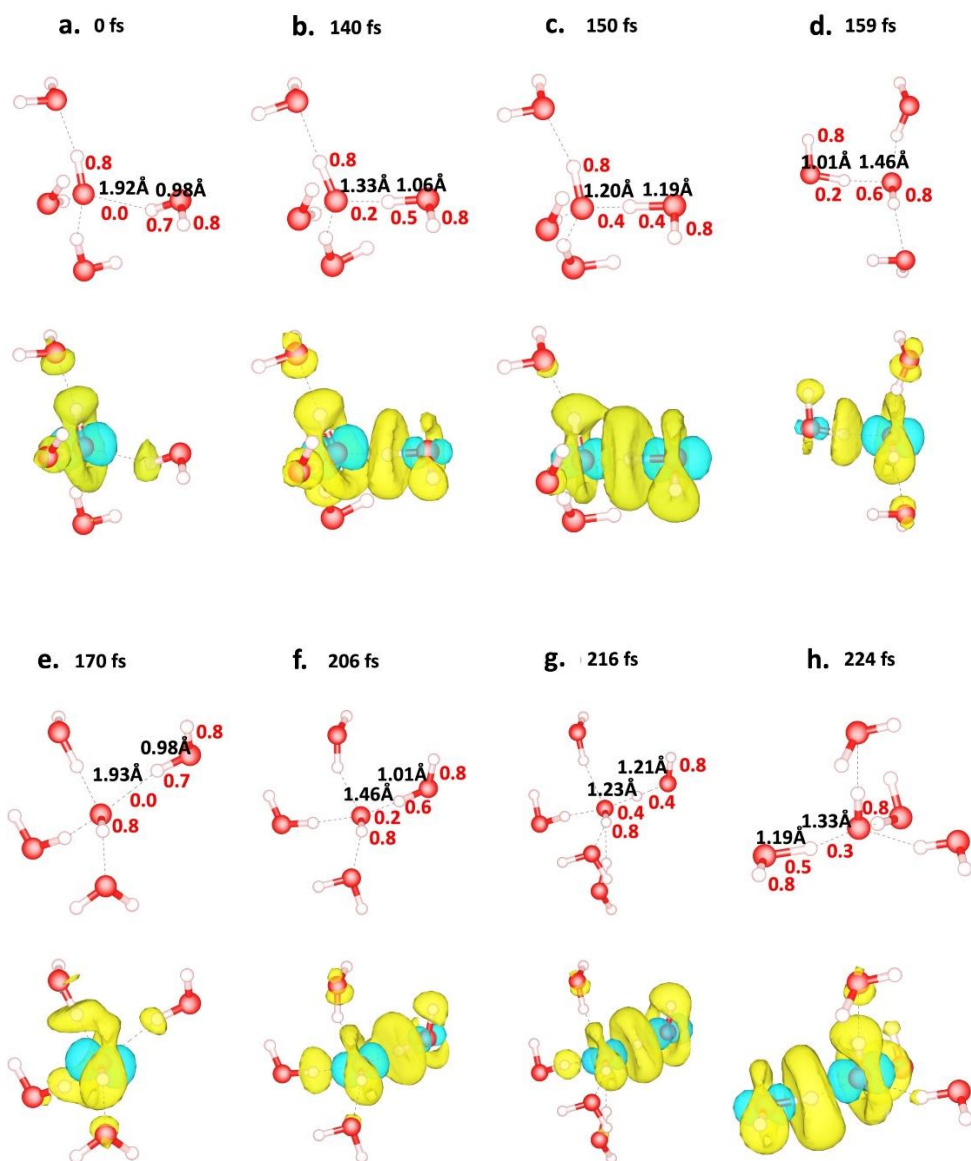

**Fig. S10.** The evolution of the molecular configurations and the spin density (yellow isosurfaces:  $+0.0005 \text{ e}/\text{\AA}^3$ ; blue isosurfaces:  $-0.02 \text{ e}/\text{\AA}^3$ ) during hydrogen transfer reactions. (a) to (d) and (e) to (h) correspond to HT3 and HT4, respectively. Bond lengths and bond orders of interest are labelled.

## 11. The free energy barrier of hydrogen transfer reaction

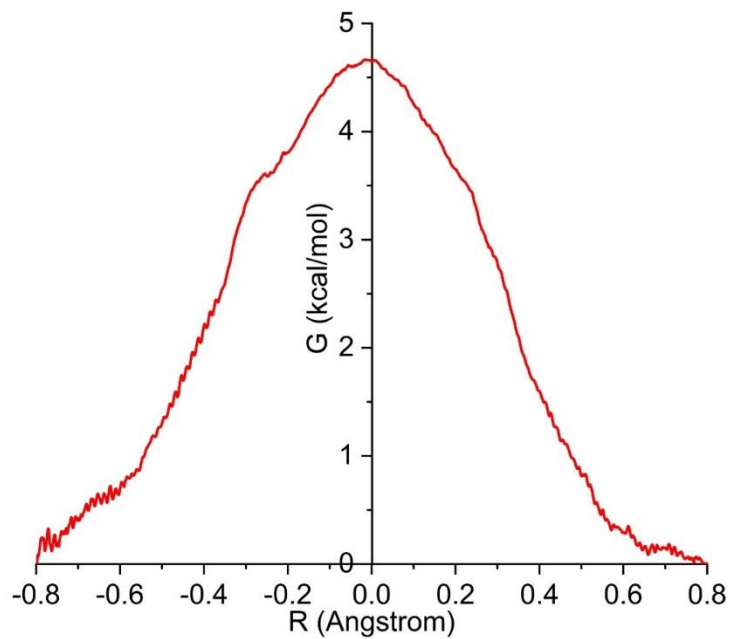

**Fig. S11.** The free energy barrier of the hydrogen transfer reaction between  $\text{OH}^*$  and a neighboring molecule. Slow-growth free energy simulations was used, with coordinate  $R$  being the difference between the O-H and  $\text{O}^*\text{-H}$  distances.
